# Supplementary material for: The nature of Pd–carbene and Pd–halogen bonds in (bisNHC)PdX2 type catalysts: insights from density functional theory
Source: Royal Society of Chemistry journal article supplement (doi:10.1039/c5ra16500h), 2015-01-01
Supplement: c5ra16500h1.pdf [file c5ra16500h1.pdf]

## Supporting Information

### **The Nature of Pd–Carbene and Pd–Halogen Bonds in (BisNHC)PdX<sub>2</sub> Type Catalysts : Insights from Density Functional Theory**

Rajangam Jagadeesan, Gunasekaran Velmurugan and Ponnambalam Venuvanalingam\*

Theoretical and Computational Chemistry Laboratory  
School of Chemistry  
Bharathidasan University

*\*corresponding author*

Tiruchirappalli – 620 024, India.

Tel: +91 431 2407053 Fax: +91 431 2407045

E-mail: [venuvanalingam@yahoo.com](mailto:venuvanalingam@yahoo.com)

## Supporting Information Table of Contents

| <b>List of Figures</b> |                                                                                                                                                                                                                                                                                            |
|------------------------|--------------------------------------------------------------------------------------------------------------------------------------------------------------------------------------------------------------------------------------------------------------------------------------------|
| SIF1                   | Backbonding interaction ( $n \rightarrow \pi^*$ ) between Palladium and bis(NHC) ligand computed at B3LYP/LANL2DZ <sup>#</sup> (# LANL2DZ for Pd, Br and I atom, 6-31g(d) for all other atoms) level                                                                                       |
| SIF2                   | Stabilization interaction between Pd-C <sub>Carbene</sub> and Pd-X bonds ( $\sigma_{C-Pd} \rightarrow \sigma^*_{Pd-X}$ ) at B3LYP/LANL2DZ <sup>#</sup> (# LANL2DZ for Pd, Br and I atom, 6-31g(d) for all other atoms) level                                                               |
| <b>List of Tables</b>  |                                                                                                                                                                                                                                                                                            |
| SIT1                   | Selected optimized geometrical parameters computed with various functionals and LANL2DZ <sup>#</sup> (# LANL2DZ for Pd, Br and I atom, 6-31g(d) for all other atoms) basis set along with crystal data* for 2a.                                                                            |
| SIT2                   | Selected bond lengths (Å) and bond angles (°) of the optimized [L <sub>n</sub> PdX <sub>2</sub> ] complexes. (L <sub>n</sub> =bisNHC, X=Cl, Br and I).                                                                                                                                     |
| SIT3                   | Natural Hybrid Orbital (NHO) Analysis of Pd-C <sub>carbene</sub> bond in complexes 1a-6c                                                                                                                                                                                                   |
| SIT4                   | Second-order perturbation (back-bonding) interaction between palladium d-orbitals and $\pi^*$ antibonding orbital of NHC computed at B3LYP/LANL2DZ <sup>#</sup> (# LANL2DZ for Pd, Br and I atom, 6-31g(d) for all other atoms) level.                                                     |
| SIT5                   | Energies (eV) of the Highest Occupied Molecular orbital (HOMO) and the Lowest Unoccupied Molecular Orbital (LUMO) of the complexes, the Highest Occupied Fragment orbital (HOMO) of PdX <sub>2</sub> fragment and the Lowest Unoccupied Fragment Orbital (LUMO) of [N-R(bisNHC)] fragment. |
| SIT6                   | Charge transfer values ( $\Delta q$ ) from carbene C atom to Pd atom and halogen atom to Pd atom in the complexes.                                                                                                                                                                         |
| SIT7                   | Natural Hybrid Orbital (NHO) Analysis of Pd-X bond.                                                                                                                                                                                                                                        |
| SIT8                   | $\sigma \rightarrow \sigma^*$ stabilization interaction between C-Pd and Pd-X.                                                                                                                                                                                                             |
| SIT9                   | Energy decomposition analysis (kcal/mol) of the interaction between X <sup>-</sup> and [N-R bis(NHC) PdX] <sup>+</sup> fragments in the equilibrium [N-R bis(NHC) PdX <sub>2</sub> ] structures.                                                                                           |
| SIT10                  | SIT10. Bond dissociation energy (BDE) of Pd-X bond obtained using different functional with def2TZVP basis set along with B3LYP/LANL2DZ <sup>#</sup> ((# LANL2DZ for Pd, Br and I atom, 6-31g(d) for all other atoms) results.                                                             |
| SIT11                  | SIT11. Bond dissociation energy (BDE) of Pd-C <sub>Carbene</sub> bond obtained using different functional with def2TZVP basis set along with B3LYP/LANL2DZ <sup>#</sup> (# LANL2DZ for Pd, Br and I atom, 6-31g(d) for all other atoms) results.                                           |
| SIT12                  | Cartesian coordinates of all the complexes and their energy ( <i>in a.u.</i> ).                                                                                                                                                                                                            |

SIF1. Backbonding interaction ( $n \rightarrow \pi^*$ ) between Palladium and bis(NHC) ligand computed at B3LYP/LANL2DZ<sup>#</sup> (# LANL2DZ for Pd, Br and I atom, 6-31g(d) for all other atoms) level.

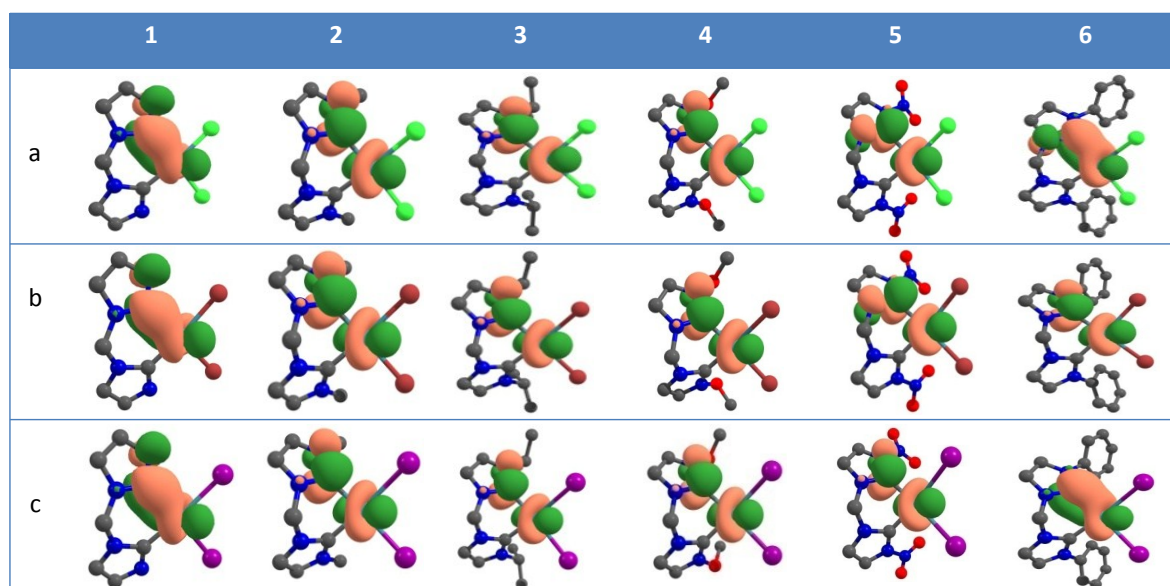

SIF2. Stabilization interaction between Pd-C<sub>Carbene</sub> and Pd-X bonds ( $\sigma_{\text{C-Pd}} \rightarrow \sigma^*_{\text{Pd-X}}$ ) at B3LYP/LANL2DZ<sup>#</sup> (# LANL2DZ for Pd, Br and I atom, 6-31g(d) for all other atoms) level.

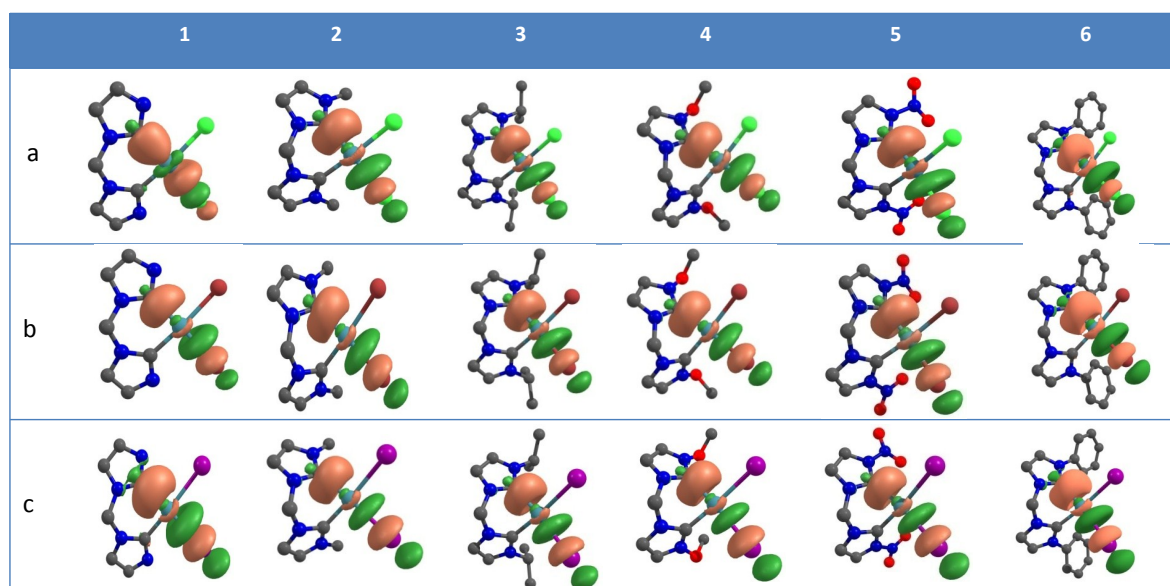

SIT1. Selected optimized geometrical parameters computed with various functionals and LANL2DZ<sup>#</sup> (# LANL2DZ for Pd, Br and I atom, 6-31g(d) for all other atoms) basis set along with crystal data\* for 2a.

| Bond Parameter | B3LYP | B3LYP-D3 | B3PW91 | M06   | PBE   | BP86  | Exp*  |
|----------------|-------|----------|--------|-------|-------|-------|-------|
| Pd-X           | 2.397 | 2.396    | 2.363  | 2.375 | 2.388 | 2.391 | 2.378 |
| Pd-C           | 2.020 | 2.018    | 1.998  | 2.018 | 2.388 | 1.999 | 1.966 |
| Pd-C-Pd        | 86.0  | 85.7     | 86.0   | 85.7  | 86.4  | 86.5  | 83.8  |
| X-Pd-X         | 92.5  | 93.1     | 92.6   | 92.6  | 91.9  | 91.9  | 91.2  |

\*T. Strassner, M. Muehlhofer, A. Zeller, E. Herdtweck and W. A. Herrmann, *J. Organomet. Chem.*, 2004, **689**, 1418-1424.

SIT2. Selected bond lengths (Å) and bond angles (°) of the optimized [L<sub>n</sub>PdX<sub>2</sub>] complexes. (L<sub>n</sub>=bisNHC, X=Cl, Br and I)

| Complex | Pd-C <sub>carbene</sub> | Pd-X   | N <sub>1</sub> -C <sub>2</sub> | N <sub>3</sub> -C <sub>2</sub> | X-Pd-X | C <sub>2</sub> -Pd-C <sub>2'</sub> | N <sub>1</sub> -C <sub>2</sub> -N <sub>3</sub> |
|---------|-------------------------|--------|--------------------------------|--------------------------------|--------|------------------------------------|------------------------------------------------|
| 1a      | 1.989                   | 2.414  | 1.344                          | 1.362                          | 96.3   | 87.5                               | 104.7                                          |
| 1b      | 2.003                   | 2.587  | 1.346                          | 1.363                          | 95.0   | 87.4                               | 104.4                                          |
| 1c      | 2.023                   | 2.746  | 1.347                          | 1.363                          | 93.3   | 87.1                               | 104.1                                          |
| 2a      | 2.019                   | 2.397  | 1.353                          | 1.365                          | 92.5   | 86.0                               | 104.6                                          |
|         | 1.966*                  | 2.378* |                                |                                | 91.2*  | 83.8*                              |                                                |
| 2b      | 2.026                   | 2.574  | 1.353                          | 1.365                          | 92.4   | 85.7                               | 104.6                                          |
| 2c      | 2.037                   | 2.738  | 1.353                          | 1.365                          | 93.1   | 85.0                               | 104.5                                          |
| 3a      | 2.020                   | 2.397  | 1.353                          | 1.365                          | 92.7   | 86.0                               | 104.8                                          |
| 3b      | 2.025                   | 2.567  | 1.353                          | 1.365                          | 93.3   | 85.6                               | 104.8                                          |
| 3c      | 2.039                   | 2.740  | 1.353                          | 1.365                          | 92.8   | 84.9                               | 104.8                                          |
| 4a      | 2.017                   | 2.388  | 1.349                          | 1.367                          | 91.8   | 84.9                               | 103.1                                          |
| 4b      | 2.023                   | 2.567  | 1.349                          | 1.368                          | 92.3   | 84.8                               | 103.1                                          |
| 4c      | 2.042                   | 2.729  | 1.349                          | 1.368                          | 92.9   | 84.9                               | 102.9                                          |
| 5a      | 2.003                   | 2.377  | 1.357                          | 1.360                          | 94.7   | 86.2                               | 102.7                                          |
| 5b      | 2.012                   | 2.558  | 1.359                          | 1.360                          | 94.6   | 86.1                               | 102.6                                          |
| 5c      | 2.028                   | 2.721  | 1.360                          | 1.360                          | 94.0   | 85.5                               | 102.5                                          |
| 6a      | 2.019                   | 2.384  | 1.360                          | 1.364                          | 93.9   | 86.7                               | 104.4                                          |
| 6b      | 2.025                   | 2.564  | 1.360                          | 1.364                          | 94.0   | 86.4                               | 104.4                                          |
| 6c      | 2.040                   | 2.728  | 1.361                          | 1.364                          | 93.7   | 85.9                               | 104.3                                          |

\*T. Strassner, M. Muehlhofer, A. Zeller, E. Herdtweck and W. A. Herrmann, *J. Organomet. Chem.*, 2004, **689**, 1418-1424.

SIT3. Natural Hybrid Orbital (NHO) Analysis of Pd-C<sub>carbene</sub> bond in complexes 1a-6c

| Complex | Occ. | polarization |       | hybridization                  |                      |
|---------|------|--------------|-------|--------------------------------|----------------------|
|         |      | Pd           | C     | Pd                             | C                    |
| 1a      | 1.82 | 24.2%        | 75.8% | s (25.5%), p (45.4%),d (29.1%) | s (39.5%), p (60.5%) |
| 1b      | 1.83 | 24.2%        | 75.8% | s (25.6%), p (45.1%),d (29.3%) | s (39.8%), p (60.2%) |
| 1c      | 1.84 | 24.0%        | 76.0% | s (26.4%), p (43.7%),d (29.9%) | s (40.2%), p(59.8%)  |
| 2a      | 1.83 | 23.3%        | 76.7% | s (25.4%), p (46.5%),d (28.1%) | s (40.1% ), p(59.9%) |
| 2b      | 1.84 | 23.4%        | 76.6% | s (25.4%), p (46.1%),d (28.5%) | s (40.2%), p (59.8%) |
| 2c      | 1.84 | 23.6%        | 76.4% | s (25.9%), p (44.5%),d (29.6%) | s (40.4%), p (59.6%) |
| 3a      | 1.83 | 23.4%        | 76.6% | s (25.3%), p (46.4%),d (28.2%) | s (40.0%), p (60.0%) |
| 3b      | 1.83 | 23.6%        | 76.4% | s (25.3%), p (46.1%),d (28.6%) | s (40.0%), p (60.0%) |
| 3c      | 1.84 | 23.5%        | 76.5% | s (25.8%), p (44.6%),d (29.6%) | s (40.0%), p (60.0%) |
| 4a      | 1.83 | 22.6%        | 77.4% | s (25.4%), p (46.7%),d (27.8%) | s (40.7%), p (59.3%) |
| 4b      | 1.84 | 22.7%        | 77.3% | s (25.5%), p (46.3%),d (28.2%) | s (40.9%), p (59.1%) |
| 4c      | 1.85 | 22.7%        | 77.3% | s (25.9%), p (45.1%),d (28.9%) | s (41.3%), p (58.7%) |
| 5a      | 1.83 | 21.8%        | 78.2% | s (25.1%), p (47.4%),d (27.5%) | s (41.5%), p (58.5%) |
| 5b      | 1.84 | 21.8%        | 78.1% | s (25.1%), p (47.1%),d (27.8%) | s (41.7%), p (58.3%) |
| 5c      | 1.85 | 21.7%        | 78.3% | s (25.8%), p (45.4%),d (28.7%) | s (41.9%), p (58.1%) |
| 6a      | 1.83 | 22.8%        | 77.2% | s (25.0%), p (47.3%),d (27.7%) | s (40.8%), p (59.2%) |
| 6b      | 1.84 | 22.9%        | 77.1% | s (24.9%), p (47.1%),d (28.1%) | s (41.0%), p (59.0%) |
| 6c      | 1.84 | 22.8%        | 77.2% | s (25.5%), p (45.4%),d (29.1%) | s (41.0%), p (59.0%) |

SIT4. Second-order perturbation (back-bonding) interaction between palladium d-orbitals and  $\pi^*$ antibonding orbital of NHC computed at B3LYP/LANL2DZ# (# LANL2DZ for Pd, Br and I atom, 6-31g(d) for all other atoms) level.

| Complex | Donor(i) | Acceptor(j)        | E(2)<br>(kcal/mol) | E(j)-E(i)<br>(a.u) | F(i,j)<br>(a.u) |
|---------|----------|--------------------|--------------------|--------------------|-----------------|
| 1a      | LP (4)Pd | $\pi^*(N_1 - C_2)$ | 7.82               | 0.23               | 0.042           |
| 1b      | LP (4)Pd | $\pi^*(N_1 - C_2)$ | 7.47               | 0.23               | 0.041           |
| 1c      | LP (4)Pd | $\pi^*(N_1 - C_2)$ | 7.11               | 0.23               | 0.040           |
| 2a      | LP (4)Pd | $\pi^*(N_1 - C_2)$ | 8.06               | 0.24               | 0.043           |
| 2b      | LP (4)Pd | $\pi^*(N_1 - C_2)$ | 8.00               | 0.24               | 0.043           |
| 2c      | LP (4)Pd | $\pi^*(N_1 - C_2)$ | 7.81               | 0.24               | 0.043           |
| 3a      | LP (4)Pd | $\pi^*(N_1 - C_2)$ | 8.00               | 0.24               | 0.043           |
| 3b      | LP (4)Pd | $\pi^*(N_1 - C_2)$ | 7.89               | 0.24               | 0.043           |
| 3c      | LP (4)Pd | $\pi^*(N_1 - C_2)$ | 7.62               | 0.24               | 0.042           |
| 4a      | LP (4)Pd | $\pi^*(N_1 - C_2)$ | 8.62               | 0.24               | 0.044           |
| 4b      | LP (4)Pd | $\pi^*(N_1 - C_2)$ | 8.55               | 0.24               | 0.044           |
| 4c      | LP (4)Pd | $\pi^*(N_1 - C_2)$ | 7.95               | 0.24               | 0.043           |
| 5a      | LP (4)Pd | $\pi^*(N_1 - C_2)$ | 9.56               | 0.22               | 0.045           |
| 5b      | LP (4)Pd | $\pi^*(N_1 - C_2)$ | 9.43               | 0.22               | 0.045           |
| 5c      | LP (4)Pd | $\pi^*(N_1 - C_2)$ | 9.04               | 0.22               | 0.045           |
| 6a      | LP (4)Pd | $\pi^*(N_1 - C_2)$ | 8.33               | 0.24               | 0.044           |
| 6b      | LP (4)Pd | $\pi^*(N_1 - C_2)$ | 8.26               | 0.24               | 0.044           |
| 6c      | LP (4)Pd | $\pi^*(N_1 - C_2)$ | 8.13               | 0.24               | 0.044           |



SIT5. Energies (eV) of the Highest Occupied Molecular orbital (HOMO) and the Lowest Unoccupied Molecular Orbital (LUMO) of the complexes, the Highest Occupied Fragment orbital (HOMO) of PdX<sub>2</sub> fragment and the Lowest Unoccupied Fragment Orbital (LUMO) of [N-R(bisNHC)] fragment.

| Complex | Complex |         | Fragment                 |                  |
|---------|---------|---------|--------------------------|------------------|
|         | HOMO    | LUMO    | HOMO of PdX <sub>2</sub> | LUMO of bis(NHC) |
| 1a      | -5.9473 | -1.2180 | -7.9544                  | 0.8626           |
| 1b      | -5.6417 | -1.5497 | -7.4075                  | 0.8626           |
| 1c      | -5.2904 | -1.7100 | -7.0491                  | 0.8626           |
| 2a      | -5.6382 | -1.0544 | -7.9544                  | 0.8670           |
| 2b      | -5.2251 | -1.3505 | -7.4075                  | 0.8670           |
| 2c      | -4.8989 | -1.4798 | -7.0491                  | 0.8670           |
| 3a      | -5.5702 | -0.9780 | -7.9544                  | 0.9464           |
| 3b      | -5.2137 | -1.2776 | -7.4075                  | 0.9464           |
| 3c      | -4.8673 | -1.4332 | -7.0491                  | 0.9464           |
| 4a      | -5.6121 | -1.2000 | -7.9544                  | 0.6876           |
| 4b      | -5.2657 | -1.4830 | -7.4075                  | 0.6876           |
| 4c      | -4.8488 | -1.6153 | -7.0491                  | 0.6876           |
| 5a      | -5.9095 | -3.0754 | -7.9544                  | -2.4958          |
| 5b      | -5.6069 | -3.1579 | -7.4075                  | -2.4958          |
| 5c      | -5.2880 | -3.1772 | -7.0491                  | -2.4958          |
| 6a      | -5.2853 | -1.0474 | -7.9544                  | -0.3086          |
| 6b      | -4.9536 | -1.1780 | -7.4075                  | -0.3086          |
| 6c      | -4.6597 | -1.3565 | -7.0491                  | -0.3086          |

SIT6. Charge transfer values ( $\Delta q$ ) from carbene C atom to Pd atom and halogen atom to Pd atom in the complexes.

| Complex | $C_{\text{carbene}} \rightarrow \text{Pd}$ |        |        | $X \rightarrow \text{Pd}$ |        |        |
|---------|--------------------------------------------|--------|--------|---------------------------|--------|--------|
|         | a                                          | b      | c      | a                         | b      | c      |
| 1       | -0.389                                     | -0.361 | -0.321 | -0.230                    | -0.275 | -0.317 |
| 2       | -0.440                                     | -0.415 | -0.378 | -0.228                    | -0.251 | -0.316 |
| 3       | -0.441                                     | -0.419 | -0.377 | -0.221                    | -0.271 | -0.313 |
| 4       | -0.419                                     | -0.392 | -0.391 | -0.242                    | -0.286 | -0.335 |
| 5       | -0.427                                     | -0.406 | -0.366 | -0.246                    | -0.299 | -0.346 |
| 6       | -0.466                                     | -0.440 | -0.400 | -0.230                    | -0.280 | -0.348 |

## SIT7. Natural Hybrid Orbital (NHO) Analysis of Pd-X bond

| Complex | Occ. | polarization |       | hybridization                  |                      |
|---------|------|--------------|-------|--------------------------------|----------------------|
|         |      | Pd           | X     | Pd                             | X                    |
| 1a      | 1.91 | 16.9%        | 83.1% | s (23.2%), p (58.7%),d (23.1%) | s (16.2%), p (83.7%) |
| 1b      | 1.90 | 19.8%        | 80.2% | s (23.2%), p (54.1%),d (22.7%) | s (15.1%), p (84.8%) |
| 1c      | 1.89 | 23.4%        | 76.6% | s (22.5%), p (54.9%),d (22.6%) | s (13.3%), p (86.7%) |
| 2a      | 1.90 | 18.1%        | 81.9% | s (23.3%), p (52.6%),d (24.1%) | s (16.1%), p (83.8%) |
| 2b      | 1.89 | 20.8%        | 79.2% | s (23.4%), p (52.9%),d (23.7%) | s (15.1%), p (84.7%) |
| 2c      | 1.87 | 24.2%        | 75.8% | s (22.9%), p (54.1%),d (2.9%)  | s (13.7%), p (86.3%) |
| 3a      | 1.90 | 17.9%        | 82.1% | s (23.4%), p (52.5%),d (24.1%) | s (16.3%), p (83.6%) |
| 3b      | 1.89 | 20.6%        | 79.4% | s (23.5%), p (52.9%),d (23.6%) | s (15.5%), p (84.4%) |
| 3c      | 1.88 | 23.9%        | 76.1% | s (23.5%), p (52.9%),d (23.6%) | s (14.1%), p (85.9%) |
| 4a      | 1.89 | 18.3%        | 81.7% | s (23.3%), p (52.4%),d (24.3%) | s (15.4%), p (84.5%) |
| 4b      | 1.88 | 21.1%        | 78.9% | s (23.4%), p (52.7%),d (23.9%) | s (14.4%), p (85.4%) |
| 4c      | 1.87 | 24.4%        | 75.6% | s (23.4%), p (53.6%),d (23.0%) | s (13.8%), p (86.2%) |
| 5a      | 1.88 | 19.6%        | 80.4% | s (23.6%), p (51.7%),d (24.7%) | s (14.5%), p (85.4%) |
| 5b      | 1.87 | 22.6%        | 77.4% | s (23.7%), p (52.0%),d (24.3%) | s (13.5%), p (86.3%) |
| 5c      | 1.85 | 26.2%        | 73.8% | s (23.0%), p (53.4%),d (23.6%) | s (12.0%), p (88.0%) |
| 6a      | 1.89 | 18.8%        | 81.2% | s (23.7%), p (51.7%),d (24.6%) | s (16.1%), p (83.8%) |
| 6b      | 1.88 | 23.8%        | 78.5% | s (23.5%), p (52.0%),d (24.1%) | s (15.3%), p (84.5%) |
| 6c      | 1.87 | 24.8%        | 75.2% | s (23.5%), p (53.0%),d (23.5%) | s (14.1%), p (86.0%) |

SIT8.  $\sigma \rightarrow \sigma^*$  stabilization interaction between C-Pd and Pd-X.

| Complex | Donor(i)               | Acceptor(j)               | E(2)<br>(kcal/mol) | E(j)-E(i)<br>(a.u) | F(i,j)<br>(a.u) |
|---------|------------------------|---------------------------|--------------------|--------------------|-----------------|
| 1a      | $\sigma_{\text{C-Pd}}$ | $\sigma^*_{\text{Pd-Cl}}$ | 18.02              | 0.65               | 0.097           |
| 1b      | $\sigma_{\text{C-Pd}}$ | $\sigma^*_{\text{Pd-Br}}$ | 15.87              | 0.64               | 0.090           |
| 1c      | $\sigma_{\text{C-Pd}}$ | $\sigma^*_{\text{Pd-I}}$  | 15.40              | 0.66               | 0.090           |
| 2a      | $\sigma_{\text{C-Pd}}$ | $\sigma^*_{\text{Pd-Cl}}$ | 17.97              | 0.63               | 0.096           |
| 2b      | $\sigma_{\text{C-Pd}}$ | $\sigma^*_{\text{Pd-Br}}$ | 15.88              | 0.62               | 0.089           |
| 2c      | $\sigma_{\text{C-Pd}}$ | $\sigma^*_{\text{Pd-I}}$  | 15.77              | 0.65               | 0.091           |
| 3a      | $\sigma_{\text{C-Pd}}$ | $\sigma^*_{\text{Pd-Cl}}$ | 18.38              | 0.63               | 0.096           |
| 3b      | $\sigma_{\text{C-Pd}}$ | $\sigma^*_{\text{Pd-Br}}$ | 16.31              | 0.61               | 0.090           |
| 3c      | $\sigma_{\text{C-Pd}}$ | $\sigma^*_{\text{Pd-I}}$  | 16.45              | 0.64               | 0.092           |
| 4a      | $\sigma_{\text{C-Pd}}$ | $\sigma^*_{\text{Pd-Cl}}$ | 16.92              | 0.64               | 0.093           |
| 4b      | $\sigma_{\text{C-Pd}}$ | $\sigma^*_{\text{Pd-Br}}$ | 14.89              | 0.63               | 0.087           |
| 4c      | $\sigma_{\text{C-Pd}}$ | $\sigma^*_{\text{Pd-I}}$  | 14.38              | 0.65               | 0.087           |
| 5a      | $\sigma_{\text{C-Pd}}$ | $\sigma^*_{\text{Pd-Cl}}$ | 15.70              | 0.66               | 0.091           |
| 5b      | $\sigma_{\text{C-Pd}}$ | $\sigma^*_{\text{Pd-Br}}$ | 13.61              | 0.65               | 0.084           |
| 5c      | $\sigma_{\text{C-Pd}}$ | $\sigma^*_{\text{Pd-I}}$  | 13.15              | 0.67               | 0.084           |
| 6a      | $\sigma_{\text{C-Pd}}$ | $\sigma^*_{\text{Pd-Cl}}$ | 16.47              | 0.62               | 0.091           |
| 6b      | $\sigma_{\text{C-Pd}}$ | $\sigma^*_{\text{Pd-Br}}$ | 14.47              | 0.61               | 0.084           |
| 6c      | $\sigma_{\text{C-Pd}}$ | $\sigma^*_{\text{Pd-I}}$  | 14.61              | 0.63               | 0.086           |

SIT9. Energy decomposition analysis (kcal/mol) of the interaction between X<sup>-</sup> and [N-R bis(NHC) PdX]<sup>+</sup> fragments in the equilibrium [N-R bis(NHC) PdX<sub>2</sub>] structures.

| Complex | $\Delta E_{\text{Pauli}}$ | $\Delta E_{\text{elestat}}$ | $\Delta E_{\text{steric}}$ | $\Delta E_{\text{orb}}$ | $\Delta E_{\text{int}}$ |
|---------|---------------------------|-----------------------------|----------------------------|-------------------------|-------------------------|
| 1a      | 89.26                     | -161.14                     | -71.88                     | -56.89                  | -128.78                 |
| 1b      | 97.92                     | -161.77                     | -63.86                     | -56.99                  | -120.85                 |
| 1c      | 92.82                     | -148.96                     | -56.14                     | -57.70                  | -113.84                 |
| 2a      | 95.11                     | -152.50                     | -57.39                     | -59.52                  | -116.91                 |
| 2b      | 103.37                    | -154.29                     | -50.92                     | -58.34                  | -109.26                 |
| 2c      | 97.18                     | -143.07                     | -45.89                     | -57.74                  | -103.63                 |
| 3a      | 94.97                     | -149.59                     | -54.61                     | -59.48                  | -114.09                 |
| 3b      | 103.48                    | -151.94                     | -48.46                     | -57.98                  | -106.44                 |
| 3c      | 97.69                     | -141.50                     | -43.81                     | -54.51                  | -98.33                  |
| 4a      | 96.39                     | -153.72                     | -57.33                     | -60.15                  | -117.49                 |
| 4b      | 104.93                    | -155.58                     | -50.64                     | -58.98                  | -109.62                 |
| 4c      | 99.99                     | -145.46                     | -45.47                     | -58.55                  | -104.02                 |
| 5a      | 97.40                     | -159.45                     | -62.06                     | -62.06                  | -124.11                 |
| 5b      | 106.06                    | -161.32                     | -55.26                     | -63.14                  | -118.40                 |
| 5c      | 100.91                    | -150.02                     | -49.11                     | -64.47                  | -113.58                 |
| 6a      | 94.97                     | -144.16                     | -49.19                     | -60.70                  | -109.88                 |
| 6b      | 103.33                    | -146.99                     | -43.66                     | -58.97                  | -102.63                 |
| 6c      | 98.04                     | -137.33                     | -39.29                     | -58.89                  | -98.18                  |

SIT10. Bond dissociation energy (BDE) of Pd-X bond obtained using different functional with def2TZVP basis set along with B3LYP/LANL2DZ# results.

| Complex | B3LYP/<br>LANL2DZ# | B3LYP-D3/<br>def2TZVP* | B3PW91/<br>def2TZVP* | M06/<br>def2TZVP * | PBE0/<br>def2TZVP * |
|---------|--------------------|------------------------|----------------------|--------------------|---------------------|
| 1a      | 130.16             | 134.47                 | 132.95               | 138.04             | 135.61              |
| 1b      | 126.94             | 125.69                 | 124.06               | 130.55             | 126.71              |
| 1c      | 115.96             | 117.54                 | 116.18               | 124.21             | 118.83              |
| 2a      | 118.98             | 123.86                 | 121.39               | 128.09             | 124.17              |
| 2b      | 116.27             | 115.27                 | 112.68               | 120.73             | 115.42              |
| 2c      | 105.97             | 107.84                 | 105.79               | 115.05             | 108.52              |
| 3a      | 116.48             | 122.27                 | 118.89               | 126.64             | 121.98              |
| 3b      | 113.87             | 113.97                 | 110.39               | 119.69             | 113.44              |
| 3c      | 103.67             | 106.84                 | 103.38               | 114.26             | 106.52              |
| 4a      | 118.14             | 122.77                 | 120.62               | 127.84             | 123.41              |
| 4b      | 115.22             | 114.04                 | 111.80               | 120.36             | 114.56              |
| 4c      | 104.69             | 106.72                 | 104.49               | 114.65             | 107.41              |
| 5a      | 123.73             | 129.51                 | 127.13               | 133.17             | 129.77              |
| 5b      | 121.81             | 121.63                 | 119.20               | 126.65             | 121.83              |
| 5c      | 113.00             | 115.34                 | 113.24               | 122.08             | 115.97              |
| 6a      | 108.59             | 116.01                 | 112.50               | 119.89             | 115.27              |
| 6b      | 106.63             | 108.18                 | 104.53               | 113.53             | 107.26              |
| 6c      | 94.59              | 102.21                 | 99.00                | 110.02             | 101.95              |

# LANL2DZ for Pd, Br and I atom, 6-31g(d) for all other atoms

\* Single point energy calculation

SIT11. Bond dissociation energy (BDE) of Pd-C<sub>Carbene</sub> bond obtained using different functional with def2TZVP basis set along with B3LYP/LANL2DZ<sup>#</sup> results.

| Complex | B3LYP/<br>LANL2DZ <sup>#</sup> | B3LYP-D3/<br>def2TZVP* | B3PW91/<br>def2TZVP* | M06/<br>def2TZVP* | PBE0/<br>def2TZVP* |
|---------|--------------------------------|------------------------|----------------------|-------------------|--------------------|
| 1a      | 120.22                         | 124.82                 | 124.06               | 123.46            | 128.42             |
| 1b      | 115.16                         | 120.58                 | 119.49               | 115.18            | 124.11             |
| 1c      | 102.76                         | 108.20                 | 106.35               | 99.48             | 111.03             |
| 2a      | 109.32                         | 117.45                 | 113.76               | 115.76            | 118.29             |
| 2b      | 104.82                         | 113.37                 | 109.38               | 107.70            | 114.17             |
| 2c      | 93.30                          | 102.18                 | 97.29                | 93.20             | 102.21             |
| 3a      | 108.72                         | 120.72                 | 114.75               | 118.66            | 119.74             |
| 3b      | 104.34                         | 116.93                 | 110.52               | 110.94            | 115.78             |
| 3c      | 92.64                          | 105.64                 | 98.24                | 96.36             | 103.69             |
| 4a      | 98.74                          | 109.40                 | 104.61               | 107.05            | 109.35             |
| 4b      | 94.12                          | 105.20                 | 100.07               | 99.05             | 105.08             |
| 4c      | 82.22                          | 93.90                  | 87.65                | 84.65             | 92.76              |
| 5a      | 79.86                          | 96.27                  | 91.43                | 93.77             | 95.66              |
| 5b      | 76.34                          | 93.04                  | 87.84                | 86.88             | 92.36              |
| 5c      | 66.84                          | 83.17                  | 77.16                | 73.92             | 81.84              |
| 6a      | 92.60                          | 111.90                 | 103.54               | 108.27            | 108.11             |
| 6b      | 89.10                          | 108.94                 | 99.91                | 101.44            | 104.79             |
| 6c      | 75.82                          | 98.61                  | 88.46                | 87.92             | 93.59              |

<sup>#</sup> LANL2DZ for Pd, Br and I atom, 6-31g(d) for all other atoms

\* Single point energy calculation

SIT12. Cartesian coordinates of all the geometries and E (*in a.u.*).

**1a E=-1537.7723451**

|    |              |              |              |
|----|--------------|--------------|--------------|
| 7  | 2.674967000  | 0.430529000  | -0.299823000 |
| 6  | 1.375283000  | 0.588873000  | 0.004766000  |
| 7  | 1.208418000  | 1.935989000  | 0.119958000  |
| 6  | 2.417580000  | 2.600502000  | -0.094606000 |
| 6  | 3.340235000  | 1.639332000  | -0.362959000 |
| 6  | -0.000007000 | 2.568953000  | 0.625411000  |
| 7  | -1.208410000 | 1.935999000  | 0.119897000  |
| 6  | -2.417559000 | 2.600524000  | -0.094712000 |
| 6  | -3.340215000 | 1.639361000  | -0.363084000 |
| 7  | -2.674966000 | 0.430550000  | -0.299898000 |
| 6  | -1.375283000 | 0.588883000  | 0.004700000  |
| 1  | 4.389789000  | 1.717548000  | -0.599137000 |
| 1  | 2.505701000  | 3.674627000  | -0.041306000 |
| 1  | -2.505668000 | 3.674651000  | -0.041436000 |
| 1  | -4.389760000 | 1.717586000  | -0.599296000 |
| 1  | -0.000033000 | 2.528545000  | 1.720845000  |
| 1  | 0.000005000  | 3.614905000  | 0.311107000  |
| 46 | -0.000004000 | -0.845647000 | 0.079901000  |
| 17 | -1.798731000 | -2.454873000 | 0.017577000  |
| 17 | 1.798724000  | -2.454852000 | 0.017331000  |
| 1  | -3.026706000 | -0.526397000 | -0.408882000 |
| 1  | 3.026698000  | -0.526417000 | -0.408834000 |

**1b E=-643.7305985**

|    |              |              |              |
|----|--------------|--------------|--------------|
| 7  | -0.975728000 | 2.673868000  | -0.377636000 |
| 6  | -1.095683000 | 1.384633000  | -0.011054000 |
| 7  | -2.434685000 | 1.204909000  | 0.165499000  |
| 6  | -3.130190000 | 2.390824000  | -0.073119000 |
| 6  | -2.197886000 | 3.316881000  | -0.418466000 |
| 6  | -3.017853000 | -0.000368000 | 0.732109000  |
| 7  | -2.434555000 | -1.205327000 | 0.164976000  |
| 6  | -3.130020000 | -2.391095000 | -0.074480000 |
| 6  | -2.197628000 | -3.316929000 | -0.420146000 |
| 7  | -0.975489000 | -2.673919000 | -0.378715000 |
| 6  | -1.095507000 | -1.384873000 | -0.011487000 |
| 1  | -2.302820000 | 4.354433000  | -0.693955000 |
| 1  | -4.202700000 | 2.462736000  | 0.021135000  |
| 1  | -4.202550000 | -2.463068000 | 0.019528000  |
| 1  | -2.302482000 | -4.354337000 | -0.696205000 |
| 1  | -2.868127000 | -0.000592000 | 1.817345000  |
| 1  | -4.088928000 | -0.000384000 | 0.521247000  |
| 46 | 0.349444000  | 0.000013000  | 0.072818000  |
| 35 | 2.098760000  | -1.905786000 | 0.020103000  |
| 35 | 2.098330000  | 1.906058000  | 0.018685000  |
| 1  | -0.036734000 | 3.055033000  | -0.527251000 |
| 1  | -0.036446000 | -3.055063000 | -0.528083000 |



**1c E= -640.1679056**

|    |              |              |              |
|----|--------------|--------------|--------------|
| 7  | -1.431406000 | 2.661743000  | -0.485346000 |
| 6  | -1.492547000 | 1.394053000  | -0.033625000 |
| 7  | -2.814573000 | 1.201348000  | 0.235641000  |
| 6  | -3.555244000 | 2.352026000  | -0.032327000 |
| 6  | -2.670080000 | 3.275469000  | -0.489193000 |
| 6  | -3.325028000 | -0.000034000 | 0.874637000  |
| 7  | -2.814558000 | -1.201390000 | 0.235608000  |
| 6  | -3.555219000 | -2.352064000 | -0.032405000 |
| 6  | -2.670047000 | -3.275480000 | -0.489308000 |
| 7  | -1.431389000 | -2.661723000 | -0.485497000 |
| 6  | -1.492527000 | -1.394077000 | -0.033649000 |
| 1  | -2.816520000 | 4.292570000  | -0.817012000 |
| 1  | -4.621346000 | 2.405997000  | 0.125292000  |
| 1  | -4.621319000 | -2.406053000 | 0.125218000  |
| 1  | -2.816478000 | -4.292569000 | -0.817171000 |
| 1  | -3.035637000 | -0.000047000 | 1.930328000  |
| 1  | -4.413754000 | -0.000039000 | 0.801576000  |
| 46 | -0.029334000 | -0.000001000 | 0.053806000  |
| 53 | 1.855883000  | 1.996699000  | 0.023535000  |
| 53 | 1.855910000  | -1.996681000 | 0.023608000  |
| 1  | -0.521488000 | -3.071798000 | -0.704868000 |
| 1  | -0.521504000 | 3.071850000  | -0.704649000 |

**2a E= -1616.3809892**

|    |              |              |              |
|----|--------------|--------------|--------------|
| 7  | -2.539498000 | 0.776439000  | 0.707708000  |
| 6  | -1.377305000 | 0.612351000  | 0.035154000  |
| 7  | -1.192020000 | 1.792742000  | -0.624586000 |
| 6  | -2.227166000 | 2.684036000  | -0.370488000 |
| 6  | -3.075562000 | 2.036033000  | 0.466225000  |
| 6  | -0.000001000 | 2.030593000  | -1.425309000 |
| 7  | 1.192018000  | 1.792743000  | -0.624586000 |
| 6  | 2.227161000  | 2.684040000  | -0.370485000 |
| 6  | 3.075559000  | 2.036037000  | 0.466224000  |
| 7  | 2.539498000  | 0.776442000  | 0.707706000  |
| 6  | 1.377305000  | 0.612352000  | 0.035153000  |
| 1  | -4.009084000 | 2.351145000  | 0.905818000  |
| 1  | -2.277192000 | 3.665396000  | -0.816172000 |
| 1  | 2.277184000  | 3.665401000  | -0.816168000 |
| 1  | 4.009081000  | 2.351150000  | 0.905816000  |
| 1  | -0.000001000 | 1.355972000  | -2.284479000 |
| 1  | -0.000002000 | 3.066224000  | -1.767885000 |
| 46 | 0.000000000  | -0.856745000 | -0.117141000 |
| 6  | -3.131125000 | -0.196745000 | 1.630099000  |
| 1  | -2.822240000 | 0.028245000  | 2.655679000  |
| 1  | -4.219168000 | -0.135595000 | 1.552633000  |
| 1  | -2.797882000 | -1.192387000 | 1.333618000  |
| 6  | 3.131130000  | -0.196743000 | 1.630092000  |

|    |              |              |              |
|----|--------------|--------------|--------------|
| 1  | 4.219173000  | -0.135615000 | 1.552601000  |
| 1  | 2.822274000  | 0.028262000  | 2.655678000  |
| 1  | 2.797865000  | -1.192383000 | 1.333627000  |
| 17 | 1.731102000  | -2.477230000 | -0.457823000 |
| 17 | -1.731100000 | -2.477231000 | -0.457823000 |

**2b E = -722.3401532**

|    |              |              |              |
|----|--------------|--------------|--------------|
| 7  | -2.516405000 | 1.339387000  | 0.733207000  |
| 6  | -1.377219000 | 1.075228000  | 0.052945000  |
| 7  | -1.191145000 | 2.167056000  | -0.744278000 |
| 6  | -2.202560000 | 3.103001000  | -0.567061000 |
| 6  | -3.038067000 | 2.573244000  | 0.360907000  |
| 6  | -0.000108000 | 2.295622000  | -1.571959000 |
| 7  | 1.190947000  | 2.167158000  | -0.744289000 |
| 6  | 2.202282000  | 3.103190000  | -0.567073000 |
| 6  | 3.037841000  | 2.573501000  | 0.360887000  |
| 7  | 2.516287000  | 1.339597000  | 0.733185000  |
| 6  | 1.377118000  | 1.075346000  | 0.052931000  |
| 1  | -3.954355000 | 2.955034000  | 0.783599000  |
| 1  | -2.249495000 | 4.026696000  | -1.122723000 |
| 1  | 2.249134000  | 4.026892000  | -1.122732000 |
| 1  | 3.954099000  | 2.955367000  | 0.783574000  |
| 1  | -0.000079000 | 1.508484000  | -2.328861000 |
| 1  | -0.000153000 | 3.275022000  | -2.052004000 |
| 46 | 0.000015000  | -0.410235000 | 0.026560000  |
| 6  | -3.094547000 | 0.493558000  | 1.780374000  |
| 1  | -2.696670000 | 0.784837000  | 2.757298000  |
| 1  | -4.179353000 | 0.620693000  | 1.772801000  |
| 1  | -2.846342000 | -0.545742000 | 1.559994000  |
| 6  | 3.094509000  | 0.493813000  | 1.780344000  |
| 1  | 4.179304000  | 0.621044000  | 1.772768000  |
| 1  | 2.696610000  | 0.785051000  | 2.757272000  |
| 1  | 2.846396000  | -0.545508000 | 1.559960000  |
| 35 | 1.863198000  | -2.162891000 | -0.261146000 |
| 35 | -1.863000000 | -2.163065000 | -0.261176000 |

**2c E=-718.7788319**

|   |              |             |              |
|---|--------------|-------------|--------------|
| 7 | -2.485357000 | 1.793484000 | 0.742505000  |
| 6 | -1.371992000 | 1.441629000 | 0.058906000  |
| 7 | -1.182374000 | 2.456848000 | -0.833876000 |
| 6 | -2.166684000 | 3.430210000 | -0.712207000 |
| 6 | -2.990418000 | 3.003208000 | 0.276830000  |
| 6 | 0.008892000  | 2.500554000 | -1.671393000 |
| 7 | 1.199414000  | 2.448868000 | -0.833318000 |
| 6 | 2.190035000  | 3.415702000 | -0.710732000 |
| 6 | 3.010218000  | 2.983081000 | 0.278823000  |
| 7 | 2.496848000  | 1.776632000 | 0.743895000  |
| 6 | 1.381687000  | 1.432289000 | 0.059429000  |
| 1 | -3.887505000 | 3.442113000 | 0.685331000  |

|    |              |              |              |
|----|--------------|--------------|--------------|
| 1  | -2.206626000 | 4.304767000  | -1.343021000 |
| 1  | 2.236274000  | 4.290044000  | -1.341410000 |
| 1  | 3.909916000  | 3.415928000  | 0.688041000  |
| 1  | 0.006201000  | 1.643217000  | -2.347416000 |
| 1  | 0.012107000  | 3.428658000  | -2.244311000 |
| 46 | -0.000254000 | -0.064019000 | 0.108208000  |
| 6  | -3.055553000 | 1.061959000  | 1.874158000  |
| 1  | -2.811643000 | 1.577060000  | 2.808692000  |
| 1  | -4.140272000 | 1.004698000  | 1.756282000  |
| 1  | -2.645381000 | 0.052772000  | 1.876443000  |
| 6  | 3.061072000  | 1.041091000  | 1.875946000  |
| 1  | 4.145834000  | 0.979547000  | 1.760695000  |
| 1  | 2.816963000  | 1.555786000  | 2.810651000  |
| 1  | 2.646628000  | 0.033625000  | 1.875689000  |
| 53 | -1.994484000 | -1.917773000 | -0.175690000 |
| 53 | 1.981766000  | -1.930764000 | -0.176692000 |

**3a E=-1773.6448387**

|    |              |              |              |
|----|--------------|--------------|--------------|
| 7  | -2.545935000 | 0.810836000  | 0.354593000  |
| 6  | -1.377977000 | 0.632471000  | -0.304106000 |
| 7  | -1.192205000 | 1.789420000  | -1.004308000 |
| 6  | -2.235787000 | 2.681126000  | -0.791575000 |
| 6  | -3.088061000 | 2.057764000  | 0.059516000  |
| 6  | 0.000152000  | 2.003537000  | -1.810384000 |
| 7  | 1.192675000  | 1.789123000  | -1.004629000 |
| 6  | 2.236523000  | 2.680578000  | -0.792131000 |
| 6  | 3.088746000  | 2.057058000  | 0.058912000  |
| 7  | 2.546269000  | 0.810369000  | 0.354261000  |
| 6  | 1.378136000  | 0.632285000  | -0.304173000 |
| 1  | -4.025246000 | 2.390394000  | 0.475698000  |
| 1  | -2.284990000 | 3.648463000  | -1.267248000 |
| 1  | 2.285912000  | 3.647868000  | -1.267879000 |
| 1  | 4.026067000  | 2.389474000  | 0.474966000  |
| 1  | -0.000053000 | 1.305083000  | -2.650605000 |
| 1  | 0.000230000  | 3.028957000  | -2.182677000 |
| 46 | -0.000026000 | -0.840092000 | -0.418389000 |
| 6  | -3.159510000 | -0.160187000 | 1.297017000  |
| 1  | -2.502094000 | -1.029455000 | 1.256749000  |
| 6  | 3.159282000  | -0.160421000 | 1.297329000  |
| 1  | 2.502577000  | -1.030176000 | 1.255923000  |
| 17 | 1.734669000  | -2.465566000 | -0.725376000 |
| 17 | -1.734610000 | -2.465646000 | -0.725150000 |
| 6  | -4.540307000 | -0.586721000 | 0.794874000  |
| 1  | -4.946595000 | -1.350369000 | 1.465916000  |
| 1  | -5.249854000 | 0.250095000  | 0.770890000  |
| 1  | -4.455677000 | -1.023164000 | -0.203621000 |
| 6  | -3.179600000 | 0.424280000  | 2.712814000  |
| 1  | -3.568940000 | -0.325449000 | 3.409161000  |
| 1  | -2.171933000 | 0.701938000  | 3.039598000  |

|   |              |              |              |
|---|--------------|--------------|--------------|
| 1 | -3.822835000 | 1.310248000  | 2.783752000  |
| 6 | 3.177134000  | 0.423798000  | 2.713287000  |
| 1 | 2.169848000  | 0.707456000  | 3.036042000  |
| 1 | 3.559119000  | -0.328286000 | 3.411178000  |
| 1 | 3.825431000  | 1.305863000  | 2.786823000  |
| 6 | 4.541013000  | -0.585905000 | 0.796954000  |
| 1 | 5.250195000  | 0.251262000  | 0.774428000  |
| 1 | 4.946791000  | -1.349660000 | 1.468206000  |
| 1 | 4.458142000  | -1.021917000 | -0.201882000 |

**3b E= -879.6041919**

|    |              |              |              |
|----|--------------|--------------|--------------|
| 7  | -2.510033000 | 1.298170000  | 0.259089000  |
| 6  | -1.375296000 | 0.947472000  | -0.388073000 |
| 7  | -1.191040000 | 1.922953000  | -1.324790000 |
| 6  | -2.200846000 | 2.874944000  | -1.266087000 |
| 6  | -3.032374000 | 2.473318000  | -0.272737000 |
| 6  | -0.000008000 | 1.946553000  | -2.161862000 |
| 7  | 1.191054000  | 1.922925000  | -1.324835000 |
| 6  | 2.200895000  | 2.874882000  | -1.266184000 |
| 6  | 3.032433000  | 2.473254000  | -0.272843000 |
| 7  | 2.510066000  | 1.298137000  | 0.259026000  |
| 6  | 1.375322000  | 0.947438000  | -0.388127000 |
| 1  | -3.944480000 | 2.916203000  | 0.093648000  |
| 1  | -2.247928000 | 3.720471000  | -1.934931000 |
| 1  | 2.247982000  | 3.720398000  | -1.935041000 |
| 1  | 3.944555000  | 2.916126000  | 0.093519000  |
| 1  | -0.000029000 | 1.072648000  | -2.816845000 |
| 1  | -0.000008000 | 2.858838000  | -2.759795000 |
| 46 | -0.000003000 | -0.530343000 | -0.228234000 |
| 6  | -3.088729000 | 0.578629000  | 1.422237000  |
| 1  | -2.500268000 | -0.337590000 | 1.492932000  |
| 6  | 3.088744000  | 0.578630000  | 1.422203000  |
| 1  | 2.500273000  | -0.337580000 | 1.492927000  |
| 35 | 1.873003000  | -2.298182000 | -0.285771000 |
| 35 | -1.873044000 | -2.298137000 | -0.285894000 |
| 6  | -4.542494000 | 0.190885000  | 1.145661000  |
| 1  | -4.922394000 | -0.396603000 | 1.987571000  |
| 1  | -5.192650000 | 1.067248000  | 1.031270000  |
| 1  | -4.604625000 | -0.427277000 | 0.246097000  |
| 6  | -2.912589000 | 1.415096000  | 2.693404000  |
| 1  | -3.269026000 | 0.845015000  | 3.557480000  |
| 1  | -1.857971000 | 1.660247000  | 2.857836000  |
| 1  | -3.483295000 | 2.351074000  | 2.650711000  |
| 6  | 2.912608000  | 1.415144000  | 2.693340000  |
| 1  | 1.857992000  | 1.660311000  | 2.857758000  |
| 1  | 3.269035000  | 0.845090000  | 3.557438000  |
| 1  | 3.483323000  | 2.351115000  | 2.650615000  |
| 6  | 4.542505000  | 0.190859000  | 1.145648000  |
| 1  | 5.192674000  | 1.067210000  | 1.031232000  |

|   |             |              |             |
|---|-------------|--------------|-------------|
| 1 | 4.922392000 | -0.396605000 | 1.987581000 |
| 1 | 4.604636000 | -0.427334000 | 0.246106000 |

**3c E= -876.0425762**

|    |              |              |              |
|----|--------------|--------------|--------------|
| 7  | -2.485277000 | 1.697682000  | 0.196771000  |
| 6  | -1.376642000 | 1.243259000  | -0.431768000 |
| 7  | -1.190390000 | 2.104327000  | -1.474804000 |
| 6  | -2.171197000 | 3.087868000  | -1.498799000 |
| 6  | -2.988979000 | 2.822906000  | -0.449903000 |
| 6  | -0.000047000 | 2.018546000  | -2.310228000 |
| 7  | 1.190487000  | 2.104109000  | -1.475018000 |
| 6  | 2.171514000  | 3.087419000  | -1.499298000 |
| 6  | 2.989622000  | 2.822181000  | -0.450728000 |
| 7  | 2.485715000  | 1.697217000  | 0.196230000  |
| 6  | 1.376743000  | 1.243083000  | -0.431942000 |
| 1  | -3.880508000 | 3.328500000  | -0.115501000 |
| 1  | -2.212416000 | 3.854779000  | -2.256878000 |
| 1  | 2.212776000  | 3.854223000  | -2.257483000 |
| 1  | 3.881452000  | 3.327480000  | -0.116680000 |
| 1  | -0.000188000 | 1.064729000  | -2.841707000 |
| 1  | -0.000036000 | 2.843861000  | -3.023313000 |
| 46 | -0.000045000 | -0.235535000 | -0.153282000 |
| 6  | -3.047211000 | 1.134037000  | 1.449042000  |
| 1  | -2.487508000 | 0.210130000  | 1.604862000  |
| 6  | 3.047629000  | 1.133766000  | 1.448576000  |
| 1  | 2.487720000  | 0.210029000  | 1.604704000  |
| 53 | -1.985322000 | -2.124362000 | -0.132943000 |
| 53 | 1.984904000  | -2.124669000 | -0.132348000 |
| 6  | -2.794473000 | 2.095535000  | 2.614941000  |
| 1  | -3.329820000 | 3.044062000  | 2.484676000  |
| 1  | -3.142681000 | 1.639391000  | 3.547336000  |
| 1  | -1.726088000 | 2.312280000  | 2.718907000  |
| 6  | -4.523910000 | 0.779013000  | 1.266108000  |
| 1  | -4.889831000 | 0.287678000  | 2.173269000  |
| 1  | -5.145772000 | 1.666421000  | 1.094883000  |
| 1  | -4.646704000 | 0.084240000  | 0.430947000  |
| 6  | 4.524254000  | 0.778423000  | 1.265568000  |
| 1  | 5.146233000  | 1.665699000  | 1.094068000  |
| 1  | 4.890192000  | 0.287237000  | 2.172800000  |
| 1  | 4.646846000  | 0.083456000  | 0.430543000  |
| 6  | 2.795270000  | 2.095581000  | 2.614258000  |
| 1  | 3.143619000  | 1.639520000  | 3.546648000  |
| 1  | 3.330780000  | 3.043977000  | 2.483725000  |
| 1  | 1.726943000  | 2.312515000  | 2.718413000  |

**4a E= -1766.6735257**

|   |              |             |             |
|---|--------------|-------------|-------------|
| 7 | -2.480916000 | 0.899396000 | 0.664387000 |
|---|--------------|-------------|-------------|

|    |              |              |              |
|----|--------------|--------------|--------------|
| 6  | -1.362209000 | 0.653321000  | -0.048188000 |
| 7  | -1.192126000 | 1.805494000  | -0.764341000 |
| 6  | -2.179957000 | 2.744210000  | -0.482377000 |
| 6  | -3.002914000 | 2.164765000  | 0.427032000  |
| 6  | -0.000053000 | 1.995675000  | -1.581255000 |
| 7  | 1.191946000  | 1.805552000  | -0.764226000 |
| 6  | 2.180070000  | 2.744056000  | -0.482645000 |
| 6  | 3.003072000  | 2.164566000  | 0.426700000  |
| 7  | 2.480894000  | 0.899312000  | 0.664273000  |
| 6  | 1.361957000  | 0.653412000  | -0.048009000 |
| 1  | -3.888293000 | 2.516663000  | 0.931029000  |
| 1  | -2.217484000 | 3.712924000  | -0.956363000 |
| 1  | 2.217690000  | 3.712729000  | -0.956708000 |
| 1  | 3.888594000  | 2.516398000  | 0.930487000  |
| 1  | 0.000002000  | 1.266434000  | -2.393775000 |
| 1  | -0.000069000 | 3.008750000  | -1.985880000 |
| 46 | -0.000059000 | -0.825199000 | -0.209340000 |
| 17 | 1.715523000  | -2.427130000 | -0.648278000 |
| 17 | -1.715376000 | -2.427304000 | -0.648667000 |
| 8  | 2.959473000  | 0.100581000  | 1.669761000  |
| 8  | -2.959538000 | 0.100688000  | 1.669875000  |
| 6  | 4.058175000  | -0.734830000 | 1.220209000  |
| 1  | 4.332470000  | -1.297875000 | 2.113383000  |
| 1  | 3.710859000  | -1.405167000 | 0.431501000  |
| 1  | 4.899713000  | -0.110815000 | 0.895830000  |
| 6  | -4.057978000 | -0.735069000 | 1.220190000  |
| 1  | -3.710101000 | -1.405996000 | 0.432233000  |
| 1  | -4.332993000 | -1.297347000 | 2.113627000  |
| 1  | -4.899211000 | -0.111251000 | 0.894663000  |

**4b E= -872.6324693**

|    |              |              |              |
|----|--------------|--------------|--------------|
| 7  | -2.455367000 | 1.420786000  | 0.641323000  |
| 6  | -1.363834000 | 1.057672000  | -0.062653000 |
| 7  | -1.191238000 | 2.102900000  | -0.927566000 |
| 6  | -2.149172000 | 3.094933000  | -0.741197000 |
| 6  | -2.957116000 | 2.658450000  | 0.257112000  |
| 6  | 0.000041000  | 2.170731000  | -1.765186000 |
| 7  | 1.191453000  | 2.102719000  | -0.927773000 |
| 6  | 2.149523000  | 3.094645000  | -0.741525000 |
| 6  | 2.957470000  | 2.658122000  | 0.256759000  |
| 7  | 2.455611000  | 1.420528000  | 0.641056000  |
| 6  | 1.364054000  | 1.057448000  | -0.062909000 |
| 1  | -3.821043000 | 3.094224000  | 0.732031000  |
| 1  | -2.181745000 | 3.994881000  | -1.335858000 |
| 1  | 2.182142000  | 3.994576000  | -1.336210000 |
| 1  | 3.821453000  | 3.093836000  | 0.731630000  |
| 1  | -0.000077000 | 1.327646000  | -2.458328000 |
| 1  | 0.000064000  | 3.112273000  | -2.315964000 |
| 46 | -0.000016000 | -0.436300000 | -0.048353000 |

|    |              |              |              |
|----|--------------|--------------|--------------|
| 35 | 1.850914000  | -2.188740000 | -0.355396000 |
| 35 | -1.851292000 | -2.188323000 | -0.355659000 |
| 8  | 2.914714000  | 0.765181000  | 1.754036000  |
| 8  | -2.914534000 | 0.765356000  | 1.754227000  |
| 6  | 4.094090000  | -0.029014000 | 1.467055000  |
| 1  | 4.336516000  | -0.483847000 | 2.428351000  |
| 1  | 3.854170000  | -0.796985000 | 0.728687000  |
| 1  | 4.917107000  | 0.617023000  | 1.138599000  |
| 6  | -4.093797000 | -0.028946000 | 1.467080000  |
| 1  | -3.853697000 | -0.796871000 | 0.728719000  |
| 1  | -4.336308000 | -0.483829000 | 2.428331000  |
| 1  | -4.916837000 | 0.617015000  | 1.138531000  |

**4c E= -869.0705536**

|    |              |              |              |
|----|--------------|--------------|--------------|
| 7  | -2.410828000 | 1.791196000  | 0.593153000  |
| 6  | -1.348376000 | 1.367478000  | -0.122591000 |
| 7  | -1.189422000 | 2.360345000  | -1.050078000 |
| 6  | -2.124244000 | 3.378726000  | -0.889805000 |
| 6  | -2.905744000 | 3.014978000  | 0.157188000  |
| 6  | -0.010358000 | 2.377425000  | -1.906640000 |
| 7  | 1.193885000  | 2.375856000  | -1.084466000 |
| 6  | 2.161979000  | 3.371642000  | -1.007784000 |
| 6  | 3.006480000  | 3.001275000  | -0.011753000 |
| 7  | 2.510382000  | 1.804338000  | 0.481163000  |
| 6  | 1.404785000  | 1.383021000  | -0.167344000 |
| 1  | -3.748362000 | 3.492212000  | 0.630613000  |
| 1  | -2.163733000 | 4.242845000  | -1.535188000 |
| 1  | 2.176189000  | 4.225431000  | -1.667347000 |
| 1  | 3.906227000  | 3.442577000  | 0.384635000  |
| 1  | -0.014182000 | 1.488599000  | -2.540172000 |
| 1  | -0.024550000 | 3.278069000  | -2.521823000 |
| 46 | 0.043031000  | -0.124419000 | -0.034456000 |
| 53 | -1.883943000 | -2.038548000 | -0.299923000 |
| 53 | 2.064741000  | -1.942117000 | -0.169024000 |
| 8  | 3.194572000  | 1.134037000  | 1.462503000  |
| 8  | -2.832729000 | 1.208576000  | 1.761496000  |
| 6  | 2.399532000  | 0.943373000  | 2.651777000  |
| 1  | 3.085349000  | 0.455507000  | 3.345273000  |
| 1  | 2.070228000  | 1.910113000  | 3.050709000  |
| 1  | 1.549635000  | 0.289261000  | 2.444821000  |
| 6  | -4.072641000 | 0.479599000  | 1.587394000  |
| 1  | -3.936942000 | -0.327603000 | 0.864446000  |
| 1  | -4.273847000 | 0.072321000  | 2.579034000  |
| 1  | -4.879051000 | 1.161017000  | 1.291109000  |

**5a E= -1946.6413016**

|   |              |             |             |
|---|--------------|-------------|-------------|
| 7 | -2.586979000 | 0.788633000 | 0.492425000 |
|---|--------------|-------------|-------------|

|    |              |              |              |
|----|--------------|--------------|--------------|
| 6  | -1.369174000 | 0.663913000  | -0.093418000 |
| 7  | -1.200127000 | 1.871784000  | -0.694576000 |
| 6  | -2.306234000 | 2.707747000  | -0.510618000 |
| 6  | -3.196386000 | 2.015609000  | 0.236845000  |
| 6  | 0.000043000  | 2.166039000  | -1.474497000 |
| 7  | 1.200199000  | 1.871753000  | -0.694568000 |
| 6  | 2.306332000  | 2.707683000  | -0.510611000 |
| 6  | 3.196452000  | 2.015527000  | 0.236873000  |
| 7  | 2.586998000  | 0.788580000  | 0.492476000  |
| 6  | 1.369210000  | 0.663878000  | -0.093409000 |
| 1  | -4.174271000 | 2.258621000  | 0.616815000  |
| 1  | -2.361598000 | 3.702012000  | -0.926621000 |
| 1  | 2.361729000  | 3.701942000  | -0.926623000 |
| 1  | 4.174335000  | 2.258518000  | 0.616861000  |
| 1  | 0.000038000  | 1.554022000  | -2.379737000 |
| 1  | 0.000057000  | 3.224968000  | -1.735925000 |
| 46 | 0.000000000  | -0.770889000 | -0.376679000 |
| 17 | 1.748743000  | -2.237862000 | -1.041057000 |
| 17 | -1.748816000 | -2.237892000 | -1.040797000 |
| 7  | 3.196891000  | -0.211288000 | 1.379211000  |
| 8  | 4.393408000  | -0.060401000 | 1.521158000  |
| 8  | 2.443367000  | -1.007237000 | 1.868216000  |
| 7  | -3.196931000 | -0.211245000 | 1.379109000  |
| 8  | -4.393441000 | -0.060303000 | 1.521055000  |
| 8  | -2.443441000 | -1.007218000 | 1.868128000  |

**5b E= -1052.6020095**

|    |              |              |              |
|----|--------------|--------------|--------------|
| 7  | -2.565101000 | 1.312534000  | 0.416502000  |
| 6  | -1.372849000 | 0.998559000  | -0.154322000 |
| 7  | -1.198645000 | 2.003630000  | -1.053286000 |
| 6  | -2.274577000 | 2.897061000  | -1.057426000 |
| 6  | -3.152607000 | 2.452916000  | -0.129498000 |
| 6  | -0.000007000 | 2.066113000  | -1.886995000 |
| 7  | 1.198640000  | 2.003628000  | -1.053299000 |
| 6  | 2.274575000  | 2.897056000  | -1.057452000 |
| 6  | 3.152610000  | 2.452912000  | -0.129530000 |
| 7  | 2.565103000  | 1.312538000  | 0.416486000  |
| 6  | 1.372852000  | 0.998556000  | -0.154337000 |
| 1  | -4.109849000 | 2.817731000  | 0.202434000  |
| 1  | -2.322014000 | 3.750160000  | -1.716759000 |
| 1  | 2.322008000  | 3.750152000  | -1.716788000 |
| 1  | 4.109855000  | 2.817727000  | 0.202396000  |
| 1  | -0.000011000 | 1.222335000  | -2.580846000 |
| 1  | -0.000009000 | 3.008020000  | -2.436776000 |
| 46 | 0.000000000  | -0.471102000 | -0.093155000 |
| 35 | 1.881261000  | -2.155669000 | -0.500721000 |
| 35 | -1.881262000 | -2.155658000 | -0.500757000 |
| 7  | -3.166044000 | 0.597041000  | 1.546192000  |
| 8  | -4.339088000 | 0.863027000  | 1.715709000  |



|   |              |              |             |
|---|--------------|--------------|-------------|
| 8 | -2.429473000 | -0.123229000 | 2.163622000 |
| 7 | 3.166045000  | 0.597058000  | 1.546184000 |
| 8 | 4.339093000  | 0.863033000  | 1.715688000 |
| 8 | 2.429476000  | -0.123210000 | 2.163619000 |

**5c E= -1049.0439061**

|    |              |              |              |
|----|--------------|--------------|--------------|
| 7  | -2.538057000 | 1.735879000  | 0.342837000  |
| 6  | -1.377445000 | 1.290830000  | -0.210026000 |
| 7  | -1.197628000 | 2.149486000  | -1.249335000 |
| 6  | -2.236791000 | 3.079857000  | -1.350896000 |
| 6  | -3.099312000 | 2.812229000  | -0.344567000 |
| 6  | 0.000015000  | 2.069452000  | -2.084379000 |
| 7  | 1.197627000  | 2.149509000  | -1.249295000 |
| 6  | 2.236761000  | 3.079920000  | -1.350792000 |
| 6  | 3.099244000  | 2.812309000  | -0.344428000 |
| 7  | 2.537994000  | 1.735930000  | 0.342937000  |
| 6  | 1.377425000  | 1.290846000  | -0.209989000 |
| 1  | -4.031065000 | 3.259831000  | -0.043392000 |
| 1  | -2.274839000 | 3.828881000  | -2.127045000 |
| 1  | 2.274821000  | 3.828953000  | -2.126932000 |
| 1  | 4.030969000  | 3.259936000  | -0.043206000 |
| 1  | 0.000034000  | 1.118251000  | -2.621436000 |
| 1  | 0.000018000  | 2.902835000  | -2.787701000 |
| 46 | -0.000002000 | -0.179682000 | 0.021203000  |
| 53 | -1.990368000 | -2.011368000 | -0.274525000 |
| 53 | 1.990426000  | -2.011297000 | -0.274620000 |
| 7  | 3.128432000  | 1.209136000  | 1.571977000  |
| 8  | 4.260000000  | 1.604671000  | 1.774572000  |
| 8  | 2.428103000  | 0.478541000  | 2.221283000  |
| 7  | -3.128532000 | 1.209089000  | 1.571865000  |
| 8  | -4.260092000 | 1.604657000  | 1.774443000  |
| 8  | -2.428155000 | 0.478643000  | 2.221286000  |

**6a E= -1999.8339393**

|   |              |             |              |
|---|--------------|-------------|--------------|
| 7 | 2.575239000  | 0.895403000 | -0.660202000 |
| 6 | 1.386158000  | 1.155027000 | -0.054344000 |
| 7 | 1.194508000  | 2.491947000 | -0.243492000 |
| 6 | 2.249068000  | 3.068943000 | -0.941385000 |
| 6 | 3.118371000  | 2.062965000 | -1.199592000 |
| 6 | 0.000001000  | 3.161321000 | 0.251375000  |
| 7 | -1.194505000 | 2.491947000 | -0.243494000 |
| 6 | -2.249066000 | 3.068944000 | -0.941385000 |
| 6 | -3.118368000 | 2.062967000 | -1.199594000 |
| 7 | -2.575237000 | 0.895405000 | -0.660204000 |
| 6 | -1.386156000 | 1.155027000 | -0.054348000 |
| 1 | 4.052229000  | 2.055667000 | -1.737833000 |
| 1 | 2.286792000  | 4.120045000 | -1.182218000 |
| 1 | -2.286789000 | 4.120047000 | -1.182217000 |
| 1 | -4.052227000 | 2.055670000 | -1.737834000 |

|    |              |              |              |
|----|--------------|--------------|--------------|
| 1  | 0.000000000  | 3.139254000  | 1.343770000  |
| 1  | 0.000002000  | 4.194283000  | -0.099481000 |
| 46 | 0.000000000  | 0.102209000  | 0.968313000  |
| 6  | -3.210918000 | -0.386211000 | -0.792871000 |
| 6  | -4.579956000 | -0.489431000 | -0.542727000 |
| 6  | -2.472833000 | -1.492229000 | -1.212611000 |
| 6  | -5.215663000 | -1.718258000 | -0.716765000 |
| 1  | -5.133390000 | 0.371535000  | -0.180252000 |
| 6  | -3.115806000 | -2.717985000 | -1.373209000 |
| 1  | -1.408511000 | -1.392148000 | -1.392390000 |
| 6  | -4.486048000 | -2.833716000 | -1.130939000 |
| 1  | -6.278502000 | -1.804745000 | -0.510744000 |
| 1  | -2.541528000 | -3.584804000 | -1.686345000 |
| 1  | -4.981712000 | -3.791984000 | -1.256326000 |
| 6  | 3.210919000  | -0.386213000 | -0.792869000 |
| 6  | 4.579959000  | -0.489431000 | -0.542739000 |
| 6  | 2.472830000  | -1.492234000 | -1.212596000 |
| 6  | 5.215665000  | -1.718259000 | -0.716776000 |
| 1  | 5.133396000  | 0.371537000  | -0.180273000 |
| 6  | 3.115802000  | -2.717990000 | -1.373194000 |
| 1  | 1.408506000  | -1.392155000 | -1.392364000 |
| 6  | 4.486047000  | -2.833719000 | -1.130938000 |
| 1  | 6.278506000  | -1.804743000 | -0.510766000 |
| 1  | 2.541522000  | -3.584812000 | -1.686319000 |
| 1  | 4.981711000  | -3.791988000 | -1.256325000 |
| 17 | -1.742429000 | -0.887129000 | 2.259475000  |
| 17 | 1.742424000  | -0.887125000 | 2.259484000  |

**6b E= -1105.7947560**

|    |              |              |              |
|----|--------------|--------------|--------------|
| 7  | -2.555368000 | 1.226740000  | 0.731424000  |
| 6  | -1.385617000 | 1.311898000  | 0.043834000  |
| 7  | -1.193849000 | 2.649976000  | -0.135241000 |
| 6  | -2.231504000 | 3.395327000  | 0.412493000  |
| 6  | -3.089514000 | 2.497598000  | 0.953310000  |
| 6  | -0.000001000 | 3.157197000  | -0.798245000 |
| 7  | 1.193857000  | 2.649978000  | -0.135260000 |
| 6  | 2.231523000  | 3.395326000  | 0.412457000  |
| 6  | 3.089532000  | 2.497594000  | 0.953271000  |
| 7  | 2.555375000  | 1.226738000  | 0.731400000  |
| 6  | 1.385629000  | 1.311899000  | 0.043802000  |
| 1  | -4.009821000 | 2.637156000  | 1.496932000  |
| 1  | -2.268143000 | 4.472604000  | 0.363929000  |
| 1  | 2.268164000  | 4.472603000  | 0.363895000  |
| 1  | 4.009841000  | 2.637150000  | 1.496891000  |
| 1  | -0.000008000 | 2.830858000  | -1.840763000 |
| 1  | -0.000002000 | 4.246853000  | -0.747525000 |
| 46 | -0.000001000 | 0.042793000  | -0.710781000 |
| 6  | 3.176889000  | 0.027004000  | 1.218567000  |
| 6  | 4.550496000  | -0.144464000 | 1.040356000  |

|    |              |              |              |
|----|--------------|--------------|--------------|
| 6  | 2.416954000  | -0.926069000 | 1.895898000  |
| 6  | 5.167841000  | -1.286658000 | 1.548635000  |
| 1  | 5.121732000  | 0.587769000  | 0.478009000  |
| 6  | 3.041921000  | -2.069642000 | 2.389771000  |
| 1  | 1.350434000  | -0.775648000 | 2.018873000  |
| 6  | 4.416021000  | -2.250976000 | 2.222036000  |
| 1  | 6.234235000  | -1.429154000 | 1.400533000  |
| 1  | 2.450935000  | -2.820449000 | 2.905728000  |
| 1  | 4.897928000  | -3.144621000 | 2.607717000  |
| 6  | -3.176893000 | 0.027008000  | 1.218580000  |
| 6  | -4.550492000 | -0.144470000 | 1.040323000  |
| 6  | -2.416974000 | -0.926055000 | 1.895944000  |
| 6  | -5.167847000 | -1.286664000 | 1.548591000  |
| 1  | -5.121713000 | 0.587755000  | 0.477949000  |
| 6  | -3.041951000 | -2.069627000 | 2.389806000  |
| 1  | -1.350459000 | -0.775625000 | 2.018953000  |
| 6  | -4.416044000 | -2.250971000 | 2.222026000  |
| 1  | -6.234236000 | -1.429168000 | 1.400453000  |
| 1  | -2.450978000 | -2.820426000 | 2.905790000  |
| 1  | -4.897959000 | -3.144615000 | 2.607698000  |
| 35 | 1.876020000  | -1.256684000 | -1.878758000 |
| 35 | -1.876015000 | -1.256660000 | -1.878788000 |

**6c E= -1102.235177**

|    |              |              |              |
|----|--------------|--------------|--------------|
| 7  | -2.530598000 | 1.724298000  | -0.112145000 |
| 6  | -1.389709000 | 1.292873000  | -0.715167000 |
| 7  | -1.192782000 | 2.177490000  | -1.734699000 |
| 6  | -2.195320000 | 3.138911000  | -1.783768000 |
| 6  | -3.040359000 | 2.848179000  | -0.766464000 |
| 6  | -0.000015000 | 2.106150000  | -2.569003000 |
| 7  | 1.192755000  | 2.177495000  | -1.734702000 |
| 6  | 2.195296000  | 3.138913000  | -1.783785000 |
| 6  | 3.040348000  | 2.848178000  | -0.766493000 |
| 7  | 2.530589000  | 1.724302000  | -0.112163000 |
| 6  | 1.389686000  | 1.292885000  | -0.715165000 |
| 1  | -3.935253000 | 3.343825000  | -0.426850000 |
| 1  | -2.221472000 | 3.920516000  | -2.527197000 |
| 1  | 2.221442000  | 3.920516000  | -2.527216000 |
| 1  | 3.935251000  | 3.343817000  | -0.426894000 |
| 1  | -0.000014000 | 1.162040000  | -3.118166000 |
| 1  | -0.000018000 | 2.945317000  | -3.265813000 |
| 46 | -0.000007000 | -0.184249000 | -0.492759000 |
| 53 | -1.990495000 | -2.042842000 | -0.646346000 |
| 53 | 1.990505000  | -2.042822000 | -0.646311000 |
| 6  | 3.145900000  | 1.162538000  | 1.056780000  |
| 6  | 4.532424000  | 1.000536000  | 1.082216000  |
| 6  | 2.364910000  | 0.821366000  | 2.160884000  |
| 6  | 5.140640000  | 0.494293000  | 2.230187000  |
| 1  | 5.124080000  | 1.231537000  | 0.201720000  |

|   |              |              |             |
|---|--------------|--------------|-------------|
| 6 | 2.981858000  | 0.305271000  | 3.299151000 |
| 1 | 1.289248000  | 0.947914000  | 2.117496000 |
| 6 | 4.368105000  | 0.145048000  | 3.339225000 |
| 1 | 6.217742000  | 0.356520000  | 2.248148000 |
| 1 | 2.374826000  | 0.027216000  | 4.155544000 |
| 1 | 4.843845000  | -0.258218000 | 4.228382000 |
| 6 | -3.145898000 | 1.162530000  | 1.056801000 |
| 6 | -4.532426000 | 1.000571000  | 1.082266000 |
| 6 | -2.364893000 | 0.821309000  | 2.160881000 |
| 6 | -5.140633000 | 0.494323000  | 2.230241000 |
| 1 | -5.124096000 | 1.231611000  | 0.201789000 |
| 6 | -2.981832000 | 0.305208000  | 3.299150000 |
| 1 | -1.289227000 | 0.947820000  | 2.117470000 |
| 6 | -4.368084000 | 0.145029000  | 3.339252000 |
| 1 | -6.217738000 | 0.356585000  | 2.248223000 |
| 1 | -2.374788000 | 0.027114000  | 4.155522000 |
| 1 | -4.843815000 | -0.258241000 | 4.228412000 |
